# Supplementary material
Source: publisher site journal article supplement (https://cdn.jamanetwork.com/ama/content_public/journal/jama/938562/joi200104supp1_prod_1601660282.95474.pdf)
Supplement: Supplementary file 1 [file joi200104supp1_prod_1601660282.95474.pdf]

## Supplementary Online Content

The WHO Rapid Evidence Appraisal for COVID-19 Therapies (REACT) Working Group. Association between administration of systemic corticosteroids and mortality among critically ill patients with COVID-19: a meta-analysis. *JAMA*. doi:10.1001/jama.2020.17023

### Lists of investigators and steering committee

**eTable 1.** Summary of assessments of the risk of bias in the estimated effect of corticosteroids on mortality and serious adverse events in each trial, with brief explanation of judgements

**eTable 2.** Characteristics of the METCOVID trial

**eTable 3.** Characteristics of patients included in the METCOVID trial

**eTable 4.** Summary of assessments of the risk of bias in the estimated effect of corticosteroids on mortality in the METCOVID trial

**eFigure 1.** Effects of corticosteroids on 28-day mortality according to whether patients received invasive mechanical ventilation (IMV) at the time of randomization

**eFigure 2.** Effects of corticosteroids on 28-day mortality according to whether patients received vasoactive medication at the time of randomization

**eFigure 3.** Effects of corticosteroids on 28-day mortality according to whether patients were aged  $\leq 60$  or  $> 60$  years at the time of randomization

**eFigure 4.** Effects of corticosteroids on 28-day mortality according to sex. Left plot: odds ratio (95% CI) in females and males in each trial

**eFigure 5.** Effects of corticosteroids on 28-day mortality according to duration of symptoms ( $\leq 7$  days or  $> 7$  days) at the time of randomization, for the four trials that recorded this information

**eFigure 6.** Additional forest plot showing the association of corticosteroids with all-cause 28-day mortality in each trial including the METCOVID trial\*, overall and according to corticosteroid drug

This supplementary material has been provided by the authors to give readers additional information about their work.

## **Lists of investigators and steering committee**

### **Efficacy of dexamethasone treatment for patients with ARDS caused by COVID-19 (DEXA-COVID19) trial**

Jesús Villar, Arthur Slutsky, José M. Añón, Emilio Maseda, Juan C. Figueira, María J. Asensio, Alejandro Suárez, Javier Veganzones, Itziar Insausti, Ana Montero, Carlos Ferrando, Ricard Mellado-Artigas, Javier Fernández, Néstor D. Toapanta, María Hernández-Tejero, Enric Reverter, Pedro Castro, Adrián Téllez, Sara Fernández, Manuel Castellá, Irene Rovira, Gerardo Aguilar, José Ferreres, José A. Carbonell, Rafael Badenes, María L. Blasco, Nieves Carbonell, Ainhoa Serrano, Mar Juan, Domingo Martínez, Juan A. Soler, Alfonso Ambrós, Carmen Martín, Rafael del Campo, Tomás Muñoz, Pablo Serna-Grande, María I. Béjar-Alonso, Gonzalo Tamayo, Alberto Martínez-Ruiz, Iñaki Bilbao-Villasante, Fernando Suárez-Sipmann, Fernando Ramasco, César Aldecoa, Jesús Rico-Feijoo, Lorena Fernández, Laura vaquero-Pérez, Lydia Pérez-Fernández, Alicia Bordell, Jseús Sánchez-Ballesteros, Pablo Blanco-Schweizer, Anxela Vidal, César Pérez-Calvo, Marina Varela-Durán, Pilar Díaz-Parada, Carolina Ferrer, Jaume Puig-Bernabeu, José de Andrés, Josep Trenado-Álvarez, Mar Fernández. Peter Jüni and Kevin E. Thorpe.

### **CODEX trial**

Adriano José Pereira, Guilherme Benfatti Olivato, Natalie Botelho Borges, Ana Lucia Neves, Cássia Righy, Pedro Kurtz, Ricardo Turon, Marília Gomes e Silva, Cristina Prata Amendola, Luciana Coelho Sanches, Luis Henrique Simões Covello, André Luiz Tosello Pentead, Bruno M Tomazini, Roberta Muriel Longo Roepke, Estevão Bassi, Eduardo Leite Vieira Costa, Marcelo Britto Passos Amato, Daniela Helena Machado de Freitas, Carlos R R Carvalho, Flavia Ribeiro Machado, Flávio Geraldo Rezende Freitas, Maria Aparecida de Souza, Fernando José da Silva Ramos, Daniel Neves Forte, José Mauro Vieira Júnior, Sâmia Yasin Wayhs, Veridiana Schulz Casalechi, Ricardo Antônio Bonifácio Moura, Caio Cesar Ferreira Fernandes, Marcelo Rodrigues Bacci, Antônio Carlos Palandri Chagas, Desirè Carlos Callegari, Livia Maria Garcia Melro, Yuri de Albuquerque Pessoa dos Santos, Anderson Roberto Dallazen, Daniel Curitiba Marcellos, Gedealvares Francisco de Souza Júnior, Ana Carolina Simões Ramos, Gláucia Gleine Souza Ferraz, Eliana Bernadete Caser, Danilo Hugo Brito Figueiredo;, Bruno Adler Maccagnan Pinheiro Besen, Leandro Utino Taniguchi, Vicente Cés de Souza Dantas, Priscilla Alves Barreto, Orlando Farias Jr., Felipe Dal Pizzol, Cristiane Ritter, Otávio Berwanger, Remo H M Furtado, Thiago D Correia, Ary Serpa Neto, Marina Politi Okoshi, Suzana Erico Tanni, Aparecido Rios Queiroz, Carlos Eduardo Pompilio, José Otto Reusing Jr., Flávio Geraldo Rezende de Freitas, Antônio Tonete Bafi, Fernanda Regina de Campos Radziavicius, Felipe Maia de Toledo Piza, Airton L O Manoel , Niklas S Campos, Conrado Roberto Hoffmann Filho, Iara Caravajal Hoffmann, Luiz Marcelo Sá Malbouisson, Thiago Tavares dos Santos, Luiz Relvas, Bruno Nunes Rodrigues, Viviane Cordeiro Veiga, Agnes Cohen Lisboa, Priscila Aquino, Vinícius Santana Nunes, Mario Diego Teles Correia, Giselle Matias de Carvalho, Sergio Yamada, Alexandre Biasi Cavalcanti, Leticia Kawano-Dourado, Pedro Vitale Mendes, João Manoel Silva Junior; Hospital Alemão Oswaldo Cruz, José Victor Gomes Costa, David J B Machado, Meton Soares De Alencar Filho, Jussara Alencar Arraes, Thales Anibal leite Barros Agostinho, Sérgio de Araújo, Priscila Freitas das Neves Gonçalves, Alexandre de Matos Soeiro, Israel Silva Maia, Ana Cristina Burigo, Bruno M Tomazini, Luciano Cesar Pontes de Azevedo, Israel Silva Maia, Cassio Zandonai, Regis Rosa, Rodrigo Santos Biondi, Rodolpho Augusto de Moura Pedro.

### **RECOVERY trial**

P Horby, WS Lim, J Emberson, M Mafham, JL Bell, L Linsell, N Staplin, C Brightling, A Ustianowski, E Elmahi, B Prudon, C Green, T Felton, D Chadwick, K Rege, C Fegan, LC Chappell, SN Faust, T Jaki, K Jeffery, A Montgomery, K Rowan, E Juszczak, JK Baillie, R Haynes, MJ Landray on behalf of the the RECOVERY Collaborative Group. Full listings of the group are provided in Horby et al. *NEJM* 2020 DOI: 10.1056/NEJMoa2021436.

### **CAPE COVID Trial**

Pierre Moine, Virginie Maxime, Bernard Clair, Rania Bounab, Francesca Santi, David Orlikowski, Julie Helms, Raphaël Clere-Jehl, Hassene Rahmani, Alexandra Monnier, Hamid Merdji, Antoine Studer, Jessy Cattelan, Laetitia Bodet-Contentin, Walid Darwiche, Stephan Ehrmann, Denis Garot, Antoine Guillon, Youenn Jouan, Annick Legras, Stefan Mankikian, Emmanuelle Mercier, Marlène Morisseau, Yonatan Perez, Charlotte Salmon-Gandonnière, Gaëtan Plantefève, Damien Contou, Elsa Logre, Radj Cally, Mégan Fraise, Hervé Mentec, Olivier Pajot, Cécile Leparco, Guillaume Voiriot, Muriel Fartoukh, Vincent Labbé, Michel Djibré, Aude Gibelin, Clarisse Blayau, Enora Berti, Paris Meng, Julien Lopinto, Matthieu Turpin, Alexandre Elabbadi, Julio Badié, Fernando Berdaguer-Ferrari, Bruno François, Arnaud Desachy, Guillaume Gilbert, Marine Goudelin, Bruno Evrard, Thomas Daix, Anne-Laure Fedou, Philippe Vignon, Cécile Aubron, Erwan L'Her, Nicolas Ferriere, Laetitia Bodenès, Pierre Bailly, Gwenael Prat, Jean-Marie Tonnelier, Anne Renault, Christelle Teiten, Jean-Damien Ricard, Damien Roux, Sébastien Besset, Louis Marie Dumont, Laura Fedirici, Marc Amouretti, Noémie Zucman, Santiago Freita, Didier Dreyfuss.

### **COVID STEROID trial**

Anders Perner, Marie Helleberg, Vibeke Jørgensen, Margit Smitt, Klaus Tjelle, Thomas Benfield, Charlotte Suppli Ulrik, Anne Sofie Andreasen, Thomas Mohr, Morten Bestle, Mette Friberg, Thomas Hildebrandt, Lene Surland Knudsen, Anders Møller, Christoffer G. Sølling, Anne Brøchner, Bodil S Rasmussen, Henrik Nielsen, Steffen Christensen, Thomas Strøm, Isik S Johansen, Morten Hylander Møller, Marie Warrer Petersen, Tine Sylvest Meyhoff, Maj-Brit Nørregaard Kjær, Peter B. Hjortrup, Carl Johan Steensen Hjortsø, Thomas Steen Jensen, Anders Granholm, Mik Wetterslev, Gitte K. Vesterlund, Lene Russell, Maria Cronhjort, Rebecka Rubenson Wahlin, Stephan Jakob, Balasubramanian Venkatesh, Vivekanand Jha, Bharat Kumar, Sheila Nainan Myatra, Naomi Hammond, Christian Glud, Theis Lange.

### **Corticosteroids therapy in adult patients with COVID-19 and ARDS (Steroids-SARI) trial**

Li Weng, Jian-feng Xie, Zhi-yong Peng, Ai-hua Qin, Ming Hu, Rui-qiang Zheng, Chun Pan, Xia Zheng, Wei Zhang, Xiu-ling Shang, Ren-yu Ding, Xiao-bo Huang, Liang Xu, Yi-shan Wang, Han-yujie Kang, Zhao-hui Tong, Hai-bo Qiu, Bin Du

### **REMAP-CAP international trial steering committee**

Farah Al-Beidh, Djillali Annane, Yaseen Arabi, Derek Angus, Wilma van Bentum-Pujik, Abigail Beane, Scott Berry, Zahra Bhimani, Marc Bonten, Charlotte Bradbury, Frank Brunkhorst, Allen Cheng, Menno de Jong, Lennie Derde, Lise Estcourt, Herman Goossens, Anthony Gordon, Cameron Green, Rashan Haniffa, Fracois Lamontagne, Patrick Lawler, Edward Litton, John Marshall, Colin McArthur, Danny McAuley, Shay McGuinness, Bryan McVerry, Paul Mouncey, Srinivas Murthy, Alistair Nichol, Rachael Parke, Jane Parker, Kathryn Rowan, Christopher Seymour, Anne Turner, Frank van de Veerdonk, Steve Webb and Ryan Zarychanski.

**eTable 1.** Summary of assessments of the risk of bias in the estimated effect of corticosteroids on mortality and serious adverse events in each trial, with brief explanation of judgements

| Outcome and study                                                                                                                                                                                                                                                                                                                                                       | Risk of bias domain (assessments for the effect of assignment to intervention) |                                               |                         |                               |                                     | Overall risk of bias |
|-------------------------------------------------------------------------------------------------------------------------------------------------------------------------------------------------------------------------------------------------------------------------------------------------------------------------------------------------------------------------|--------------------------------------------------------------------------------|-----------------------------------------------|-------------------------|-------------------------------|-------------------------------------|----------------------|
|                                                                                                                                                                                                                                                                                                                                                                         | 1. Randomization process                                                       | 2. Deviations from the intended interventions | 3. Missing outcome data | 4. Measurement of the outcome | 5. Selection of the reported result |                      |
| <b>Results for 28-day mortality</b>                                                                                                                                                                                                                                                                                                                                     |                                                                                |                                               |                         |                               |                                     |                      |
| DEXA- COVID19 (NCT04325061)                                                                                                                                                                                                                                                                                                                                             | Low                                                                            | Low                                           | Low                     | Low                           | Low                                 | Low                  |
| CoDEX (NCT04327401)                                                                                                                                                                                                                                                                                                                                                     | Low                                                                            | Low                                           | Low                     | Low                           | Low                                 | Low                  |
| RECOVERY (NCT04381936)                                                                                                                                                                                                                                                                                                                                                  | Low                                                                            | Low                                           | Low                     | Low                           | Low                                 | Low                  |
| CAPE_COVID (NCT02517489)                                                                                                                                                                                                                                                                                                                                                | Low                                                                            | Low                                           | Low                     | Low                           | Low                                 | Low                  |
| COVID STEROID (NCT04348305)                                                                                                                                                                                                                                                                                                                                             | Low                                                                            | Low                                           | Low                     | Low                           | Low                                 | Low                  |
| REMAP-CAP (NCT02735707)                                                                                                                                                                                                                                                                                                                                                 | Low                                                                            | Low                                           | Low                     | Low                           | Low                                 | Low                  |
| Steroids-SARI (NCT04244591)                                                                                                                                                                                                                                                                                                                                             | Some concerns                                                                  | Low                                           | Low                     | Low                           | Low                                 | Some concerns        |
| <i>Randomization process: Concerns about (i) the fixed block size within centres (which it might have been easy to deduce, despite the blinding) and (ii) the rather informal use of text messages to implement allocations.</i>                                                                                                                                        |                                                                                |                                               |                         |                               |                                     |                      |
| <b>Results for serious adverse events</b>                                                                                                                                                                                                                                                                                                                               |                                                                                |                                               |                         |                               |                                     |                      |
| DEXA- COVID19 (NCT04325061)                                                                                                                                                                                                                                                                                                                                             | Low                                                                            | Low                                           | Low                     | Some concerns                 | Low                                 | Some concerns        |
| <i>Outcome measurement: Outcome assessors were not blinded and there was room for subjectivity in how serious adverse events were determined.</i>                                                                                                                                                                                                                       |                                                                                |                                               |                         |                               |                                     |                      |
| CoDEX (NCT04327401)                                                                                                                                                                                                                                                                                                                                                     | Low                                                                            | Low                                           | Low                     | Some concerns                 | Low                                 | Some concerns        |
| <i>Outcome measurement: The trial was open label and there was room for subjectivity in how serious adverse events were determined.</i>                                                                                                                                                                                                                                 |                                                                                |                                               |                         |                               |                                     |                      |
| CAPE_COVID (NCT02517489)                                                                                                                                                                                                                                                                                                                                                | Low                                                                            | Low                                           | Low                     | Low                           | Low                                 | Low                  |
| COVID STEROID (NCT04348305)                                                                                                                                                                                                                                                                                                                                             | Low                                                                            | Low                                           | Low                     | Low                           | Low                                 | Low                  |
| REMAP-CAP (NCT02735707)                                                                                                                                                                                                                                                                                                                                                 | Low                                                                            | Low                                           | Low                     | Some concerns                 | Low                                 | Some concerns        |
| <i>Outcome measurement: The trial was open label and there was room for subjectivity in how serious adverse events were determined.</i>                                                                                                                                                                                                                                 |                                                                                |                                               |                         |                               |                                     |                      |
| Steroids-SARI (NCT04244591)                                                                                                                                                                                                                                                                                                                                             | Some concerns                                                                  | Low                                           | Low                     | Some concerns                 | Low                                 | Some concerns        |
| <i>Randomization: Concerns about (i) the fixed block size within centres (which it might have been easy to deduce, despite the blinding) and (ii) the rather informal use of text messages to implement allocations.<br/>Outcome measurement: Outcome assessors were not blinded and there was room for subjectivity in how serious adverse events were determined.</i> |                                                                                |                                               |                         |                               |                                     |                      |

**eTable 2.** Characteristics of the METCOVID trial

|                                          | <b>METCOVID</b>                                                                                                                                                                                                                                                                                                                                                  |
|------------------------------------------|------------------------------------------------------------------------------------------------------------------------------------------------------------------------------------------------------------------------------------------------------------------------------------------------------------------------------------------------------------------|
| <b>ClinicalTrials.gov identifier</b>     | NCT04343729                                                                                                                                                                                                                                                                                                                                                      |
| <b>Planned sample size</b>               | 420                                                                                                                                                                                                                                                                                                                                                              |
| <b>Eligibility criteria</b>              | Hospitalized patients with clinical AND/OR radiological suspicion of COVID-19 (history of fever AND any respiratory symptom, e.g., cough or dyspnea AND/OR ground glass opacity OR pulmonary consolidation on CT scan), aged 18 years or older at the time of inclusion, with SpO <sub>2</sub> ≤ 94% at room air OR in use of supplementary oxygen OR under IMV. |
| <b>Corticosteroid</b>                    |                                                                                                                                                                                                                                                                                                                                                                  |
| <b>Drug name</b>                         | Methylprednisolone                                                                                                                                                                                                                                                                                                                                               |
| <b>Dosage and administration</b>         | Intravenous (0.5 mg/kg), twice daily, for 5 days                                                                                                                                                                                                                                                                                                                 |
| <b>Dose classification</b>               | High                                                                                                                                                                                                                                                                                                                                                             |
| <b>Control intervention</b>              | Saline solution twice daily, for 5 days                                                                                                                                                                                                                                                                                                                          |
| <b>Primary outcome</b>                   | 28-d mortality                                                                                                                                                                                                                                                                                                                                                   |
| <b>Mortality outcome, d</b>              | 28                                                                                                                                                                                                                                                                                                                                                               |
| <b>Serious adverse event definitions</b> | <ul style="list-style-type: none"><li>•Sepsis or positive blood culture collected on day 7</li><li>•Insulin due to hyperglycemia</li></ul>                                                                                                                                                                                                                       |
| <b>Location</b>                          | Brazil                                                                                                                                                                                                                                                                                                                                                           |

**eTable 3.** Characteristics of patients included in the METCOVID trial

|                                                                                                                    | METCOVID (ITT)<br>(NCT04343729) |            |
|--------------------------------------------------------------------------------------------------------------------|---------------------------------|------------|
|                                                                                                                    | Steroid                         | No steroid |
| Total patients randomized by 16 June 2020 (N)                                                                      | 209                             | 207        |
| PCR-confirmed SARS-COV-2 infection (N, %)                                                                          | 170 (82.5)                      | 162 (78.6) |
| Mechanical ventilation at time of randomization (if applicable) (N, %)                                             | 71 (33.97)                      | 70 (33.82) |
| Cells below show data for patients who were receiving invasive mechanical ventilation at the time of randomization |                                 |            |
| On vasoactive medication at the time of randomization (N, %)                                                       | 54 (78.3)                       | 59 (84.3)  |
| Female sex (N, %)                                                                                                  | 20 (28.2)                       | 13 (18.6)  |
| Median (IQR) age (years)                                                                                           | 58 [50–68]                      | 65 [56–72] |
| Treated with any antiviral at the time of randomization <sup>1</sup>                                               | 34 (50.1)                       | 33 (47.1)  |
| Treated with remdesivir at the time of randomization (N, %)                                                        | 0                               | 0          |
| Treated with lopinavir/ritonavir at the time of randomization (N, %)                                               | 0                               | 0          |
| Treated with favipravir at the time of randomization (N, %)                                                        | 0                               | 0          |
| Treated with hydroxychloroquine <sup>2</sup> at the time of randomization (N, %)                                   | 19 (26.8)                       | 25 (35.7)  |
| Treated with azithromycin at the time of randomization (N, %)                                                      | 49 (81.7)                       | 50 (75.8)  |
| Treated with convalescent plasma at the time of randomization (N, %)                                               | 0                               | 0          |

1. Only Oseltamivir was checked

2. Chloroquine or hydroxychloroquine

Information on individual antiviral drugs not available

**eTable 4.** Summary of assessments of the risk of bias in the estimated effect of corticosteroids on mortality in the METCOVID trial

| Outcome and study                  | Risk of bias domain (assessments for the effect of assignment to intervention) |                                               |                         |                               |                                     | Overall risk of bias |
|------------------------------------|--------------------------------------------------------------------------------|-----------------------------------------------|-------------------------|-------------------------------|-------------------------------------|----------------------|
|                                    | 1. Randomization process                                                       | 2. Deviations from the intended interventions | 3. Missing outcome data | 4. Measurement of the outcome | 5. Selection of the reported result |                      |
| <b>Result for 28-day mortality</b> |                                                                                |                                               |                         |                               |                                     |                      |
| METACOVID (NCT04343729)            | Low                                                                            | Low                                           | Low                     | Low                           | Low                                 | <b>Low</b>           |

**eFigure 1.** Effects of corticosteroids on 28-day mortality according to whether patients received invasive mechanical ventilation (IMV) at the time of randomization Left plot: odds ratio (95% CI) in each subgroup in each trial. Right plot: ratio of odds ratios comparing effects in patients who were and were not invasively mechanically ventilated in each trial, together with a fixed-effect meta-analysis of these ratios of odds ratios. Only trials that recruited critically ill patients who both were and were not invasively mechanically ventilated at the time of randomization contributed to the right plot. See Figure 3 for the effect of Dexamethasone in RECOVERY trial patients who required oxygen with or without non-invasive ventilation but were not invasively mechanically ventilated at randomization.

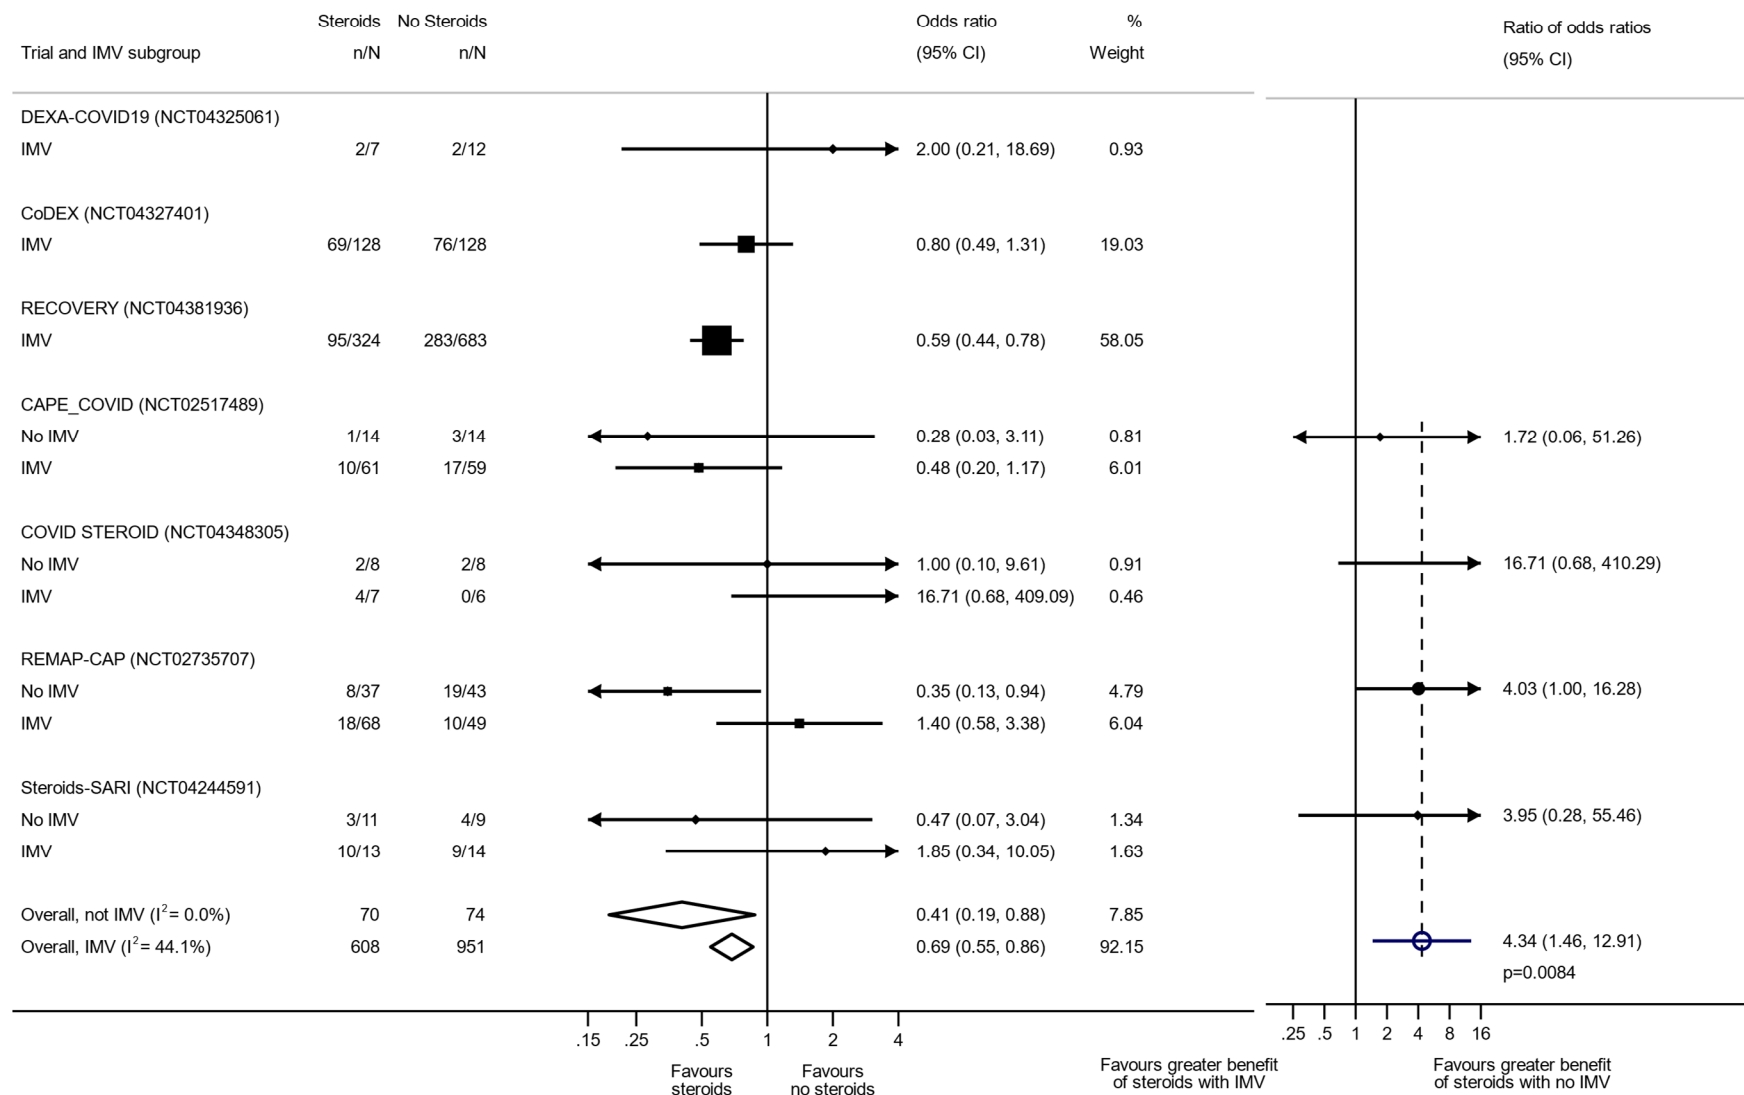



**eFigure 2.** Effects of corticosteroids on 28-day mortality according to whether patients received vasoactive medication at the time of randomization

Left plot: odds ratio (95% CI) in each subgroup in each trial. Right plot: ratio of odds ratios comparing effects in patients who were and were not receiving vasoactive medication in each trial, together with a fixed-effect meta-analysis of these ratios of odds ratios. The RECOVERY trial did not record whether patients received vasoactive medication at the time of randomization.

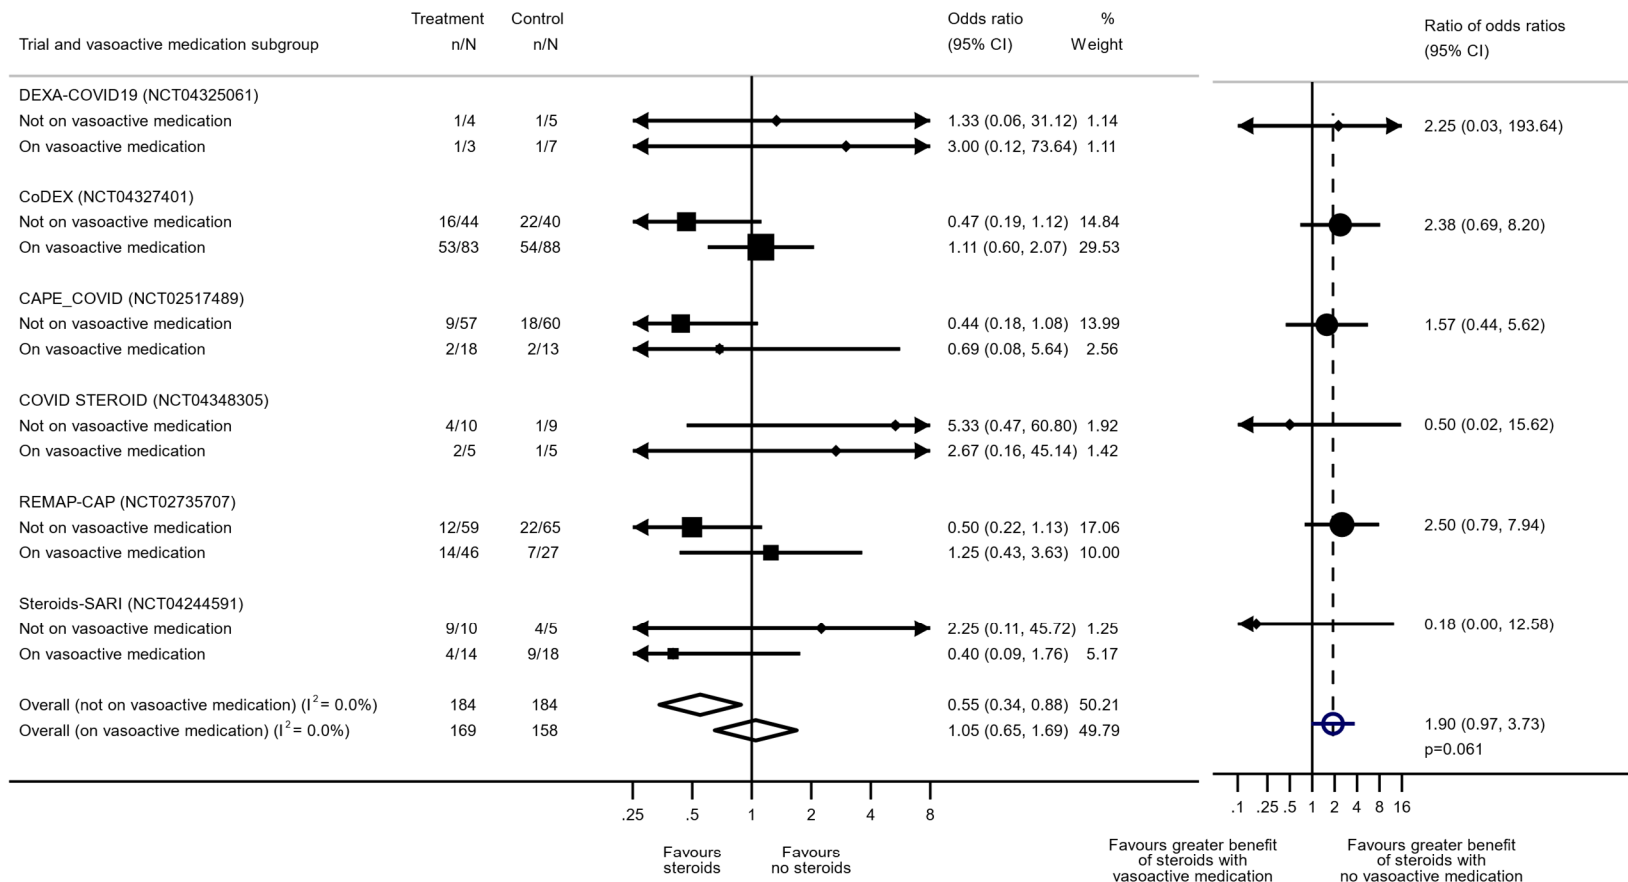

**eFigure 3.** Effects of corticosteroids on 28-day mortality according to whether patients were aged ≤60 or >60 years at the time of randomization

Left plot: odds ratio (95% CI) in each subgroup in each trial. Right plot: ratio of odds ratios comparing effects in patients who were and were not aged >60 years in each trial, together with a fixed-effect meta-analysis of these ratios of odds ratios.

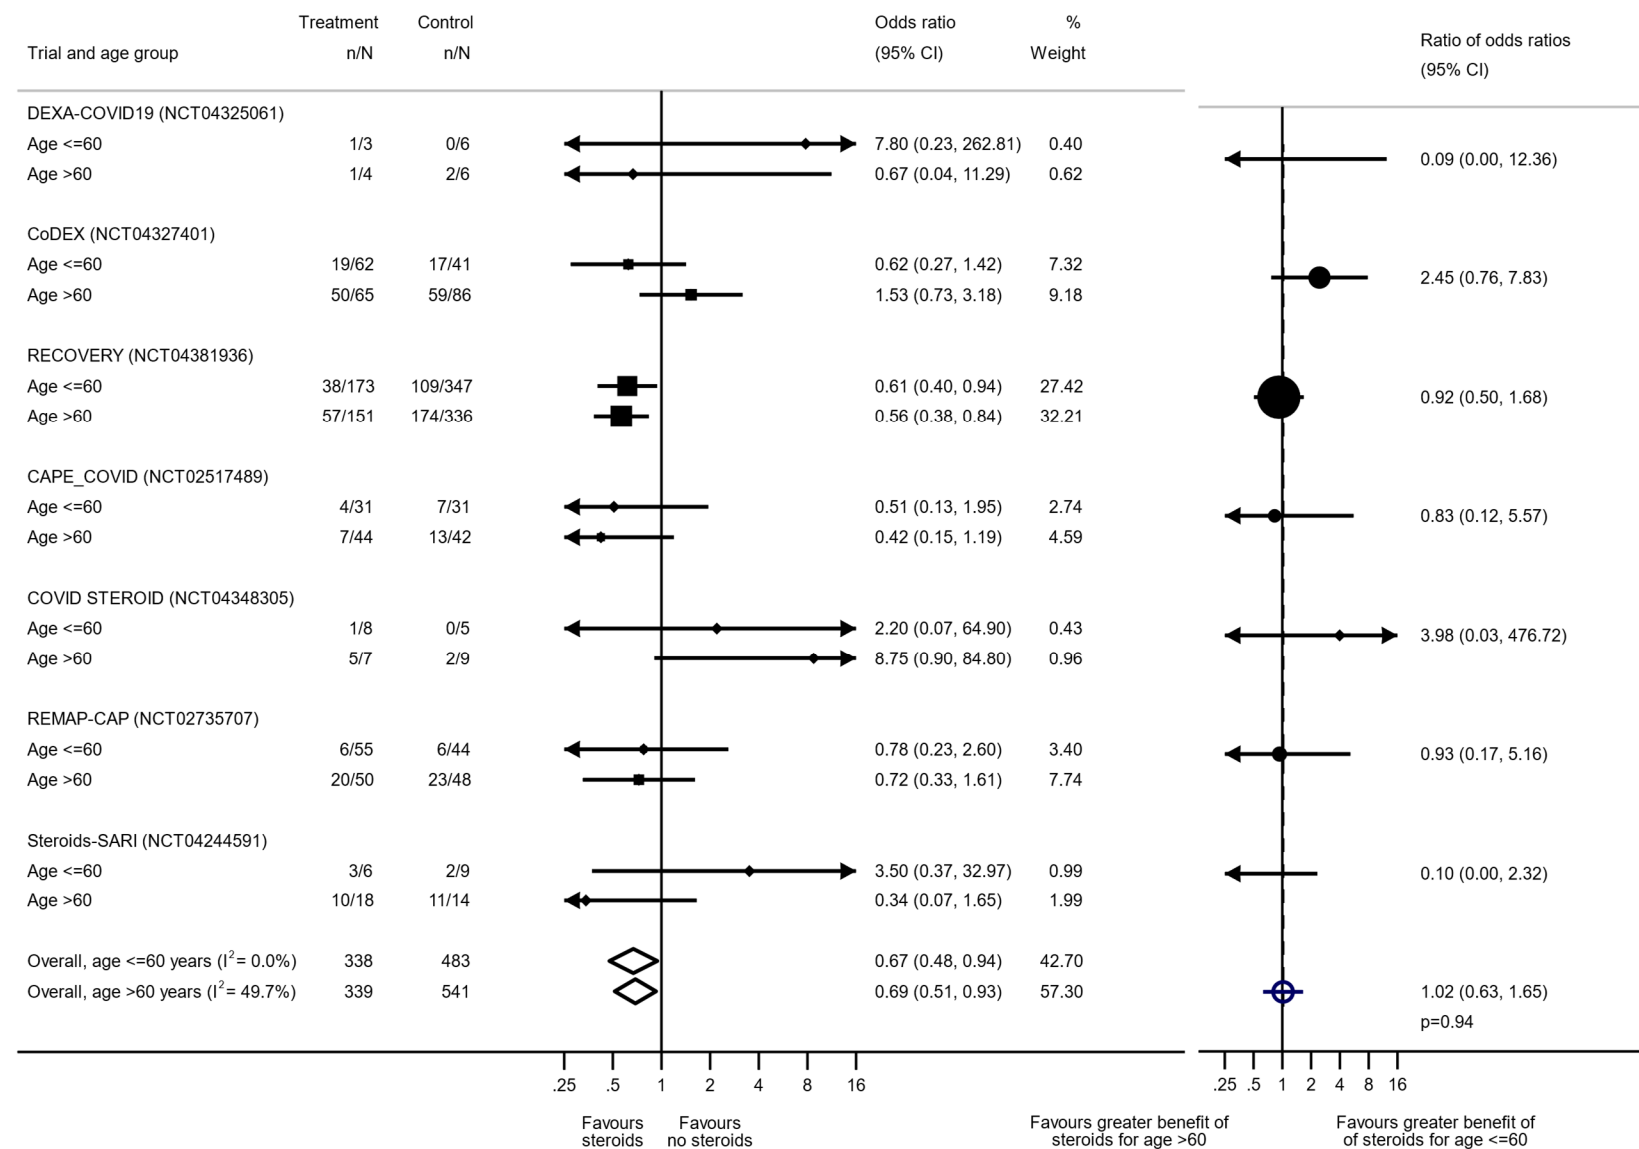

**eFigure 4.** Effects of corticosteroids on 28-day mortality according to sex. Left plot: odds ratio (95% CI) in females and males in each trial

Right plot: ratio of odds ratios comparing effects in males and females in each trial, together with a fixed-effect meta-analysis of these ratios of odds ratios.

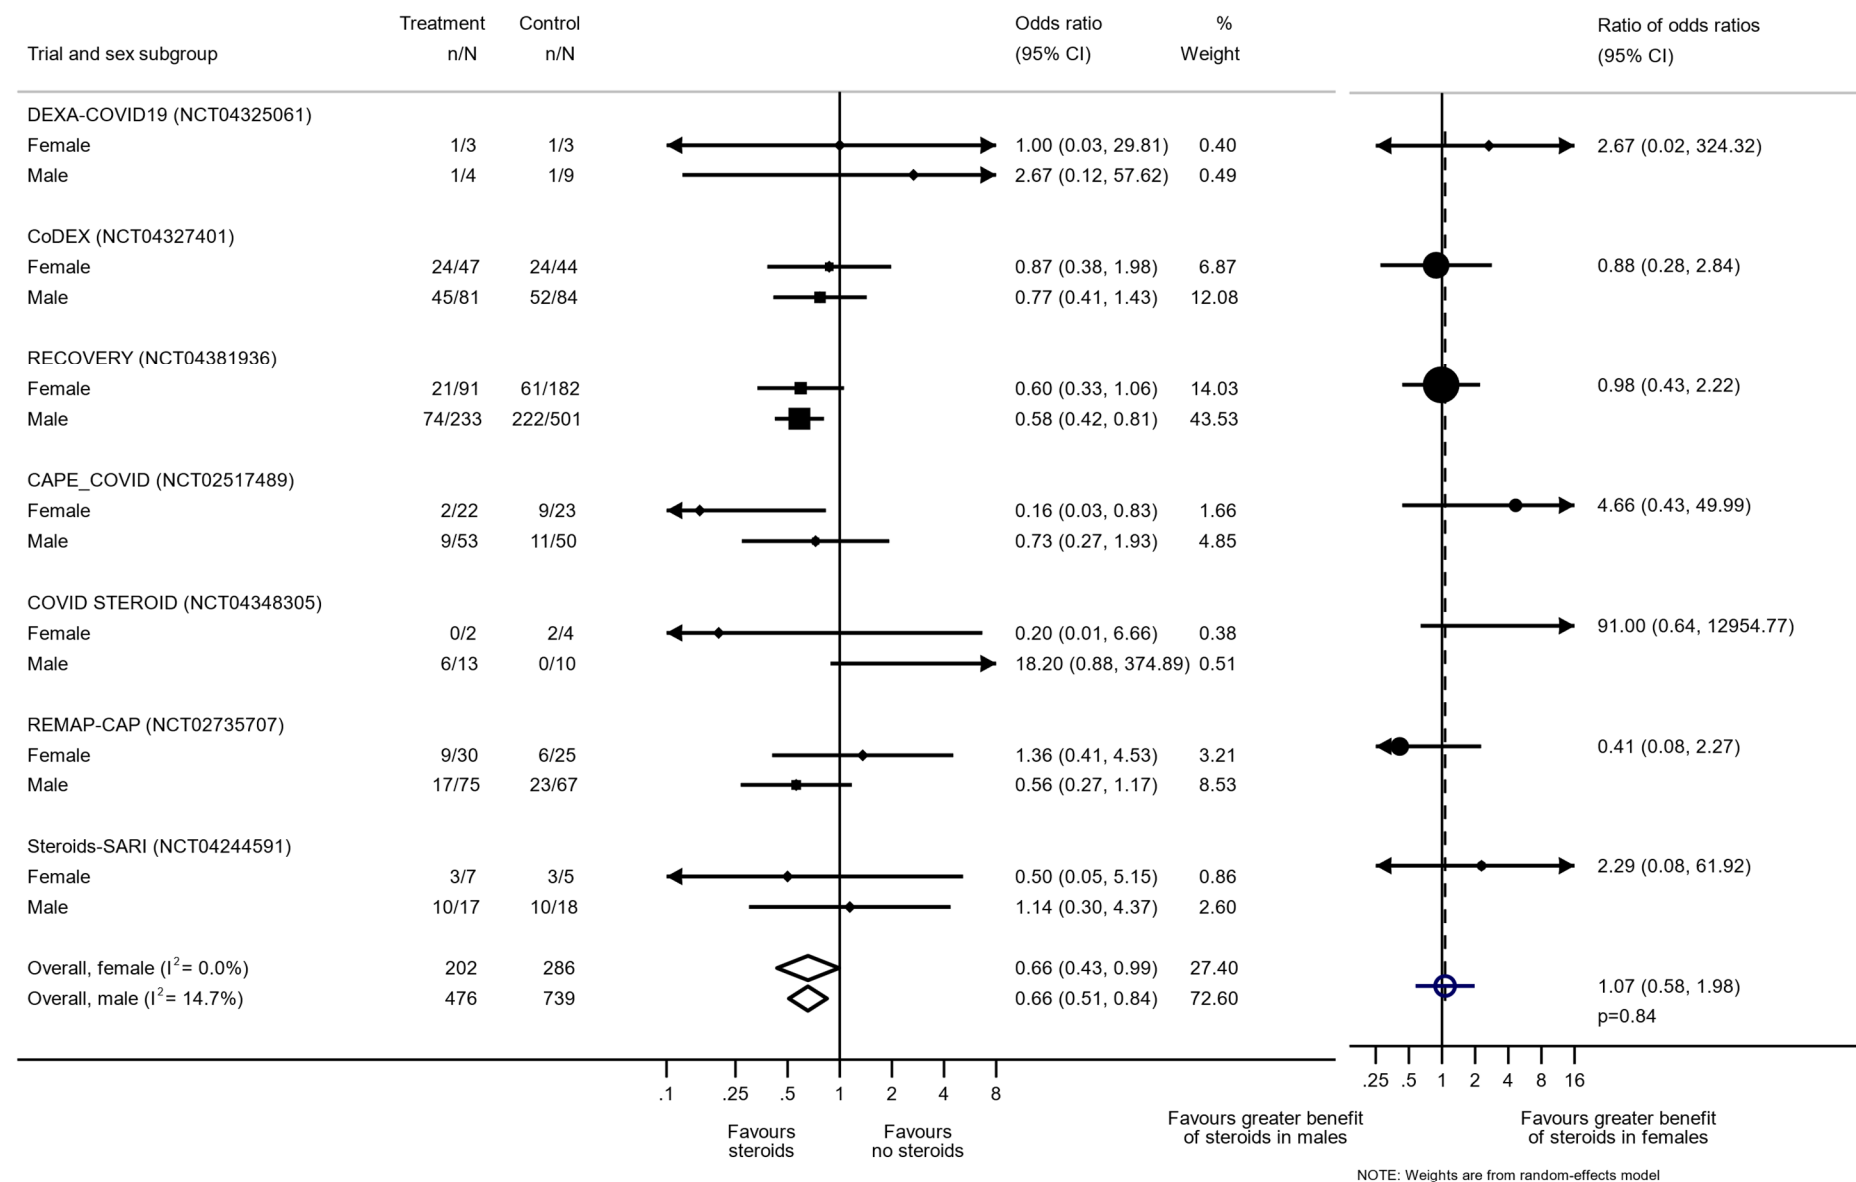

**eFigure 5.** Effects of corticosteroids on 28-day mortality according to duration of symptoms ( $\leq 7$  days or  $>7$  days) at the time of randomization, for the four trials that recorded this information

This was a post-hoc analysis based on results reported by the RECOVERY trial. Left plot: odds ratio (95% CI) in each subgroup in each trial. Right plot: ratio of odds ratios comparing effects in patients with  $>7$  days versus  $\leq 7$  days duration of symptoms in each trial, together with a fixed-effect meta-analysis of these ratios of odds ratios. The Steroids-SARI trial did not recruit patients with duration of symptoms  $\leq 7$  days, so did not contribute to the right plot.

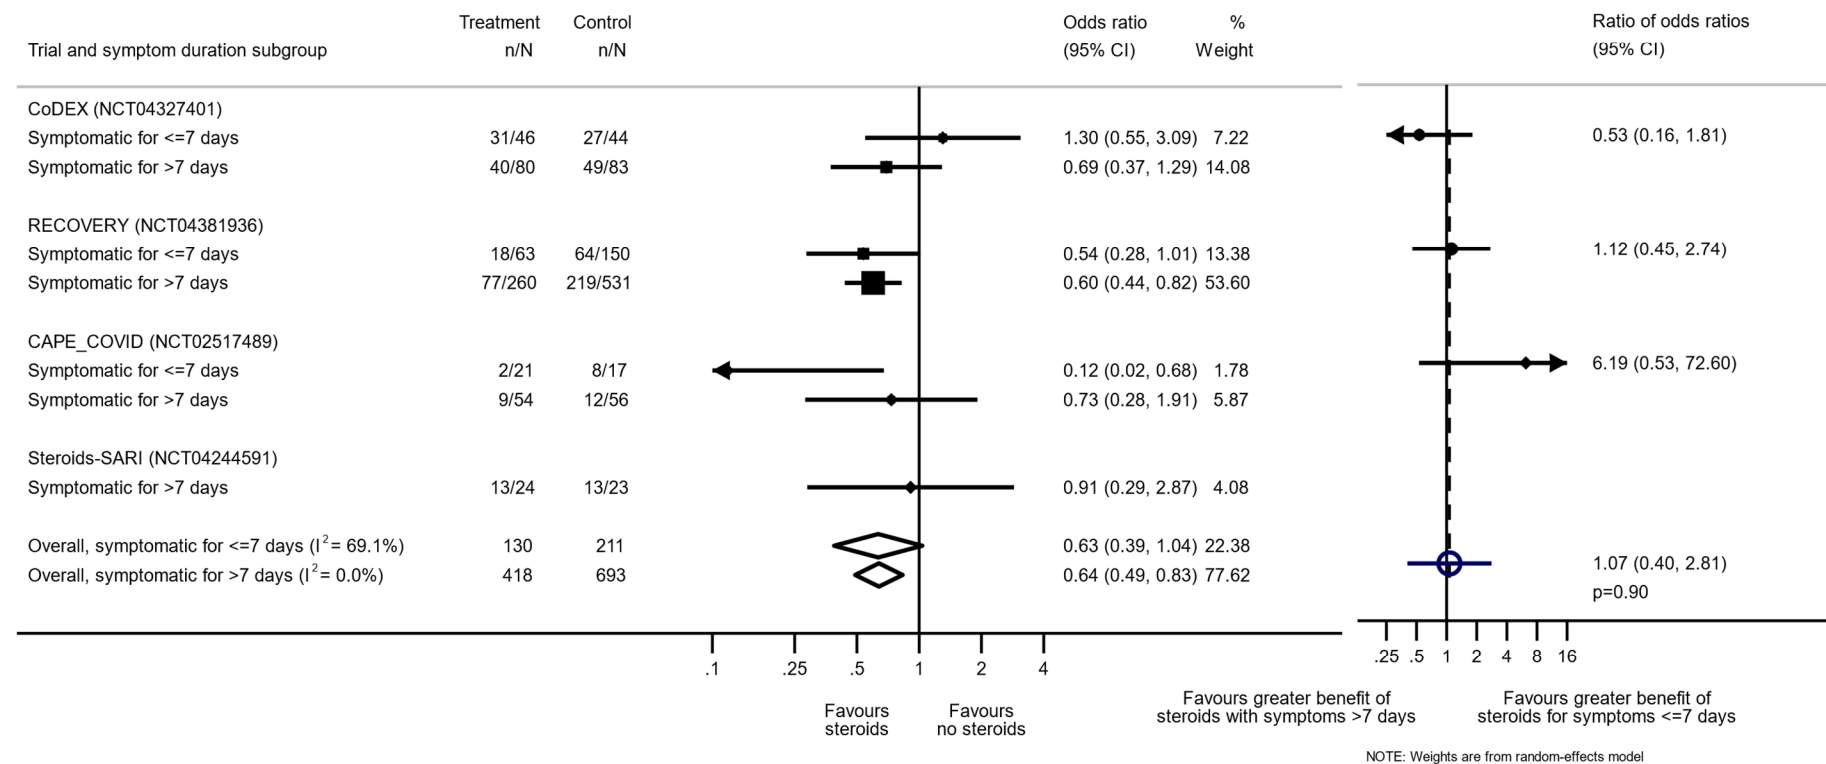

**eFigure 6.** Additional forest plot showing the association of corticosteroids with all-cause 28-day mortality in each trial including the METCOVID trial\*, overall and according to corticosteroid drug

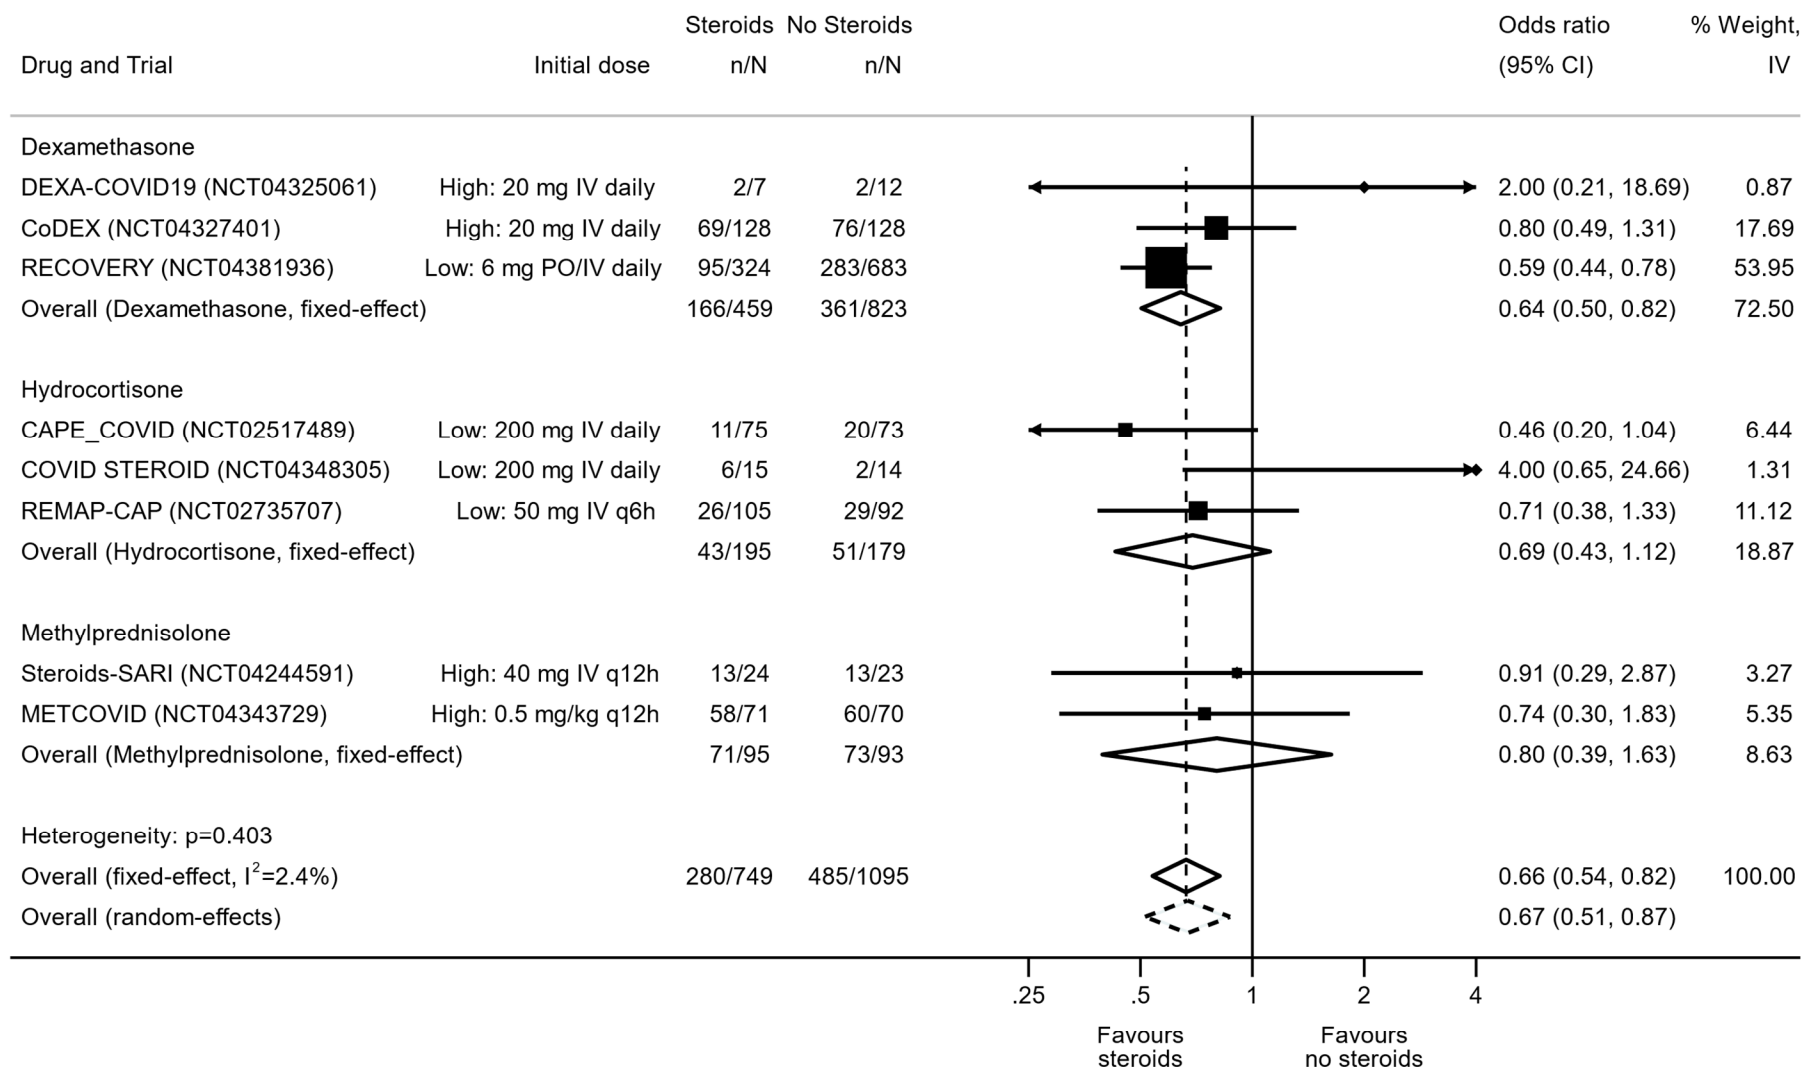

The diamonds shown with solid lines are from fixed-effect meta-analyses (primary analysis). The diamond shown with dashed lines is from a random-effects meta-analysis

\* The RECOVERY and METCOVID trial results are for patients who were receiving invasive mechanical ventilation at randomization.
